# Supplementary material for: β-NaYF4:Yb,Tm: upconversion properties by controlling the transition probabilities at the same energy level
Source: Royal Society of Chemistry journal article supplement (doi:10.1039/c6qi00121a), 2016-01-01
Supplement: c6qi00121a1.pdf [file c6qi00121a1.pdf]

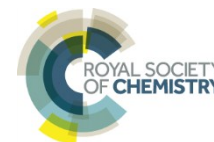

Journal Name

ARTICLE

## Supporting Information

### $\beta$ -NaYF<sub>4</sub>:Yb,Tm:upconversion properties by controlling the transition probabilities at the same energy level

Min Li,<sup>a</sup> Xiaoyang Liu,<sup>a</sup> Li Liu,<sup>b</sup> Bing Ma,<sup>a</sup> Benxian Li,<sup>a</sup> Xudong Zhao,<sup>a</sup> Wenming Tong<sup>a</sup> and Xiaofeng Wang<sup>\*a</sup>

<sup>a</sup>State Key Laboratory of Inorganic Synthesis and Preparative Chemistry Jilin University, Changchun 130012, China. E-mail: wangxf103@jlu.edu.cn; Fax: +86-431-85168601; Tel: +86-431-85168601

<sup>b</sup>Department of Chemistry, Northeast Normal University, Changchun 130024, China

## List of Contents

**Figure S1.** XRD patterns of  $\beta$ -NaYF<sub>4</sub>: Yb, Tm samples and the standard data of hexagonal NaYF<sub>4</sub> (JCPDS No. 16-0334). (A)  $\beta$ -NaYF<sub>4</sub> without doped, (B) 5%Yb<sup>3+</sup>, 0.5%Tm<sup>3+</sup>, (C) 10%Yb<sup>3+</sup>, 0.5%Tm<sup>3+</sup>, (D) 1.0%Mn<sup>2+</sup>, 10%Yb<sup>3+</sup>, 0.5%Tm<sup>3+</sup>, (E) 8.0%Mn<sup>2+</sup>, 10%Yb<sup>3+</sup>, 0.5%Tm<sup>3+</sup>.

**Figure S2.** SEM micrograph of the  $\beta$ -NaYF<sub>4</sub>: 10%Yb<sup>3+</sup>, 0.5%Tm<sup>3+</sup> samples prepared at 180°C with reaction time 24 h.

**Figure S3.** Room temperature UC emission spectra of (A) the  $\beta$ -NaYF<sub>4</sub>: 20%Yb<sup>3+</sup>, 0.5%Tm<sup>3+</sup>. (B) the  $\beta$ -NaYF<sub>4</sub>: 30%Yb<sup>3+</sup>, 0.5%Tm<sup>3+</sup>. (C) the  $\beta$ -NaYF<sub>4</sub>: 50%Yb<sup>3+</sup>, 0.5%Tm<sup>3+</sup>. (D) the  $\beta$ -NaYF<sub>4</sub>: 70%Yb<sup>3+</sup>, 0.5%Tm<sup>3+</sup>. (E) the  $\beta$ -NaYF<sub>4</sub>: 100%Yb<sup>3+</sup>, 0.5%Tm<sup>3+</sup>. The samples were tested under laser excitation at 980nm with the pump power of 250mW.

**Figure S4.** Room temperature UC emission spectra of (A) the  $\beta$ -NaYF<sub>4</sub>: 10%Yb<sup>3+</sup>, 1.0%Mn<sup>2+</sup>, 0.5%Tm<sup>3+</sup>. (B) the  $\beta$ -NaYF<sub>4</sub>: 10%Yb<sup>3+</sup>, 2.0%Mn<sup>2+</sup>, 0.5% Tm<sup>3+</sup>. The samples were tested under laser excitation at 980nm with the pump power of 250mW.

**Figure S5.** Room temperature UC emission spectra of the  $\beta$ -NaYF<sub>4</sub>: 10%Yb<sup>3+</sup>, 0.5%Tm<sup>3+</sup> with the reaction time of 6h. The samples were tested under laser excitation at 980nm with the pump power of 250mW.

**Figure S6.** Room temperature UC emission spectra of (A) the  $\beta$ -NaYF<sub>4</sub>: 10%Yb<sup>3+</sup>, 1%Tm<sup>3+</sup>. (B) the  $\beta$ -NaYF<sub>4</sub>: 10%Yb<sup>3+</sup>, 2%Tm<sup>3+</sup>. (C) the  $\beta$ -NaYF<sub>4</sub>: 10%Yb<sup>3+</sup>, 4%Tm<sup>3+</sup>. (D) the  $\beta$ -NaYF<sub>4</sub>: 10%Yb<sup>3+</sup>, 8%Tm<sup>3+</sup>. The samples were tested under laser excitation at 980nm with the pump power of 250mW.

**Figure S7.** Room temperature UC emission spectra of the  $\beta$ -NaYF<sub>4</sub>: 10%Yb<sup>3+</sup>, 5%Mn, 1%Tm<sup>3+</sup> under laser excitation at 980nm with different pump power: (A) 150mW, (B) 200mW, (C) 250mW, (D) 300mW.

**Figure S8.** CIE chromaticity diagram of the  $\beta$ -NaYF<sub>4</sub>: 10%Yb<sup>3+</sup>, 5%Mn, 0.5%Tm samples prepared under laser excitation at 980nm with different Pump power: (A) 150mW, (B) 200mW, (C) 250mW, (D) 300mW.

**Table S1.** The emission intensities table of  $\beta$ -NaYF<sub>4</sub>: xYb, 0.5%Tm prepared with different concentration of Yb<sup>3+</sup> at different wavelengths, The integrated intensities of two photon transition(T) and The intensities of the overall integrated emission (four photon transition group + three photon transition group + two photon transition group)(A). The pump power is 250mW at 980nm

**Table S2.** The emission intensities table of  $\beta$ -NaYF<sub>4</sub>: 10%Yb, xMn, 0.5%Tm prepared with different concentration of Mn<sup>2+</sup> at different wavelengths, The integrated intensities of two photon transition(T) and The intensities of the overall integrated emission (four photon transition group + three photon transition group + two photon transition group)(A). The pump power is 250mW at 980nm.

**Table S3.** The emission intensities table of  $\beta$ -NaYF<sub>4</sub>: 10%Yb, 0.5%Tm prepared with different reaction times at different wavelengths, The integrated intensities of two photon transition(T) and The intensities of the overall integrated emission (four photon transition group + three photon transition group + two photon transition group)(A). The pump power is 250mW at 980nm.

**Table S4.** The emission intensities table of  $\beta$ -NaYF<sub>4</sub>: 10%Yb, xTm prepared with different concentration of Tm<sup>3+</sup> at different wavelengths, The integrated intensities of two photon transition(T) and The intensities of the overall integrated emission (four photon transition group + three photon transition group + two photon transition group)(A). The pump power is 250mW at 980nm.

**Table S5.** The emission intensities table of  $\beta$ -NaYF<sub>4</sub>: 10%Yb, 5%Mn, 0.5%Tm prepared with different Pump power at different wavelengths, The integrated intensities of two photon transition(T) and The intensities of the overall integrated emission (four photon transition group + three photon transition group + two photon transition group)(A).

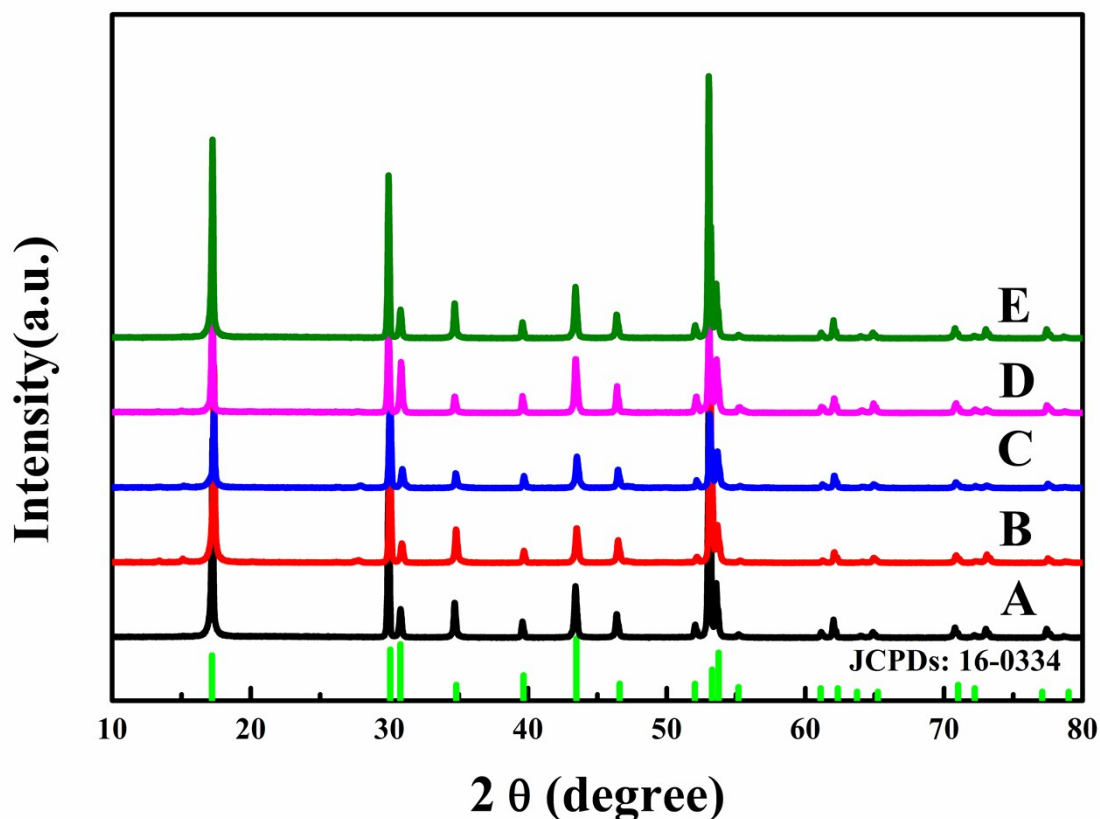

**Figure S1.** XRD patterns of  $\beta$ -NaYF<sub>4</sub>: Yb, Tm samples and the standard data of hexagonal NaYF<sub>4</sub> (JCPDS No. 16-0334). (A)  $\beta$ -NaYF<sub>4</sub> without doped, (B) 5%Yb<sup>3+</sup>, 0.5%Tm<sup>3+</sup>, (C) 10%Yb<sup>3+</sup>, 0.5%Tm<sup>3+</sup>, (D) 1.0%Mn<sup>2+</sup>, 10%Yb<sup>3+</sup>, 0.5%Tm<sup>3+</sup>, (E) 8.0%Mn<sup>2+</sup>, 10%Yb<sup>3+</sup>, 0.5%Tm<sup>3+</sup>.

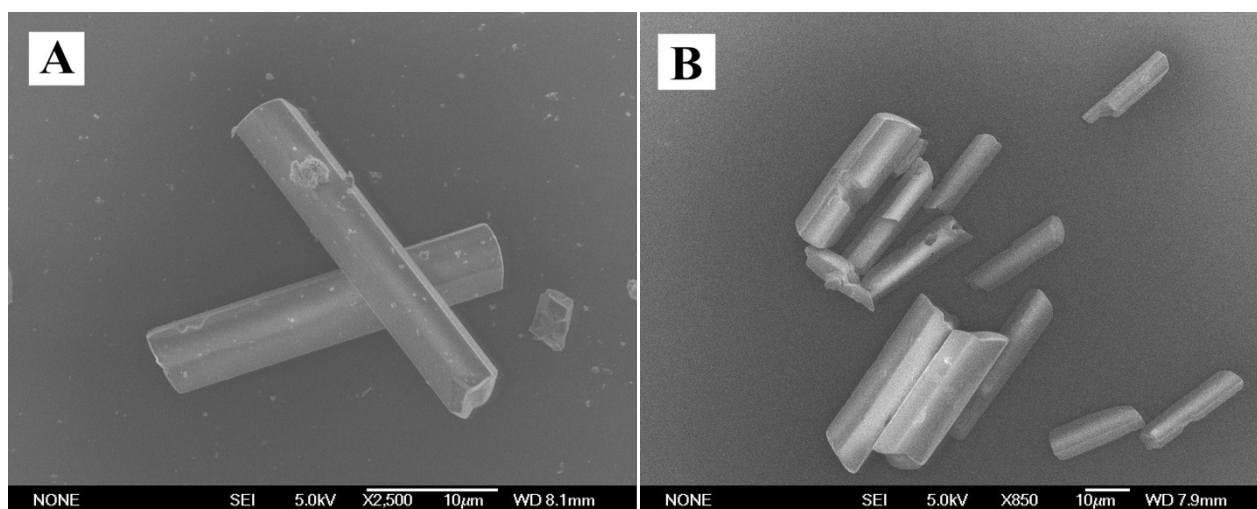

**Figure S2.** SEM micrograph of the  $\beta$ -NaYF<sub>4</sub>: 10%Yb<sup>3+</sup>, 0.5%Tm<sup>3+</sup> samples prepared at 180°C with reaction time 24 h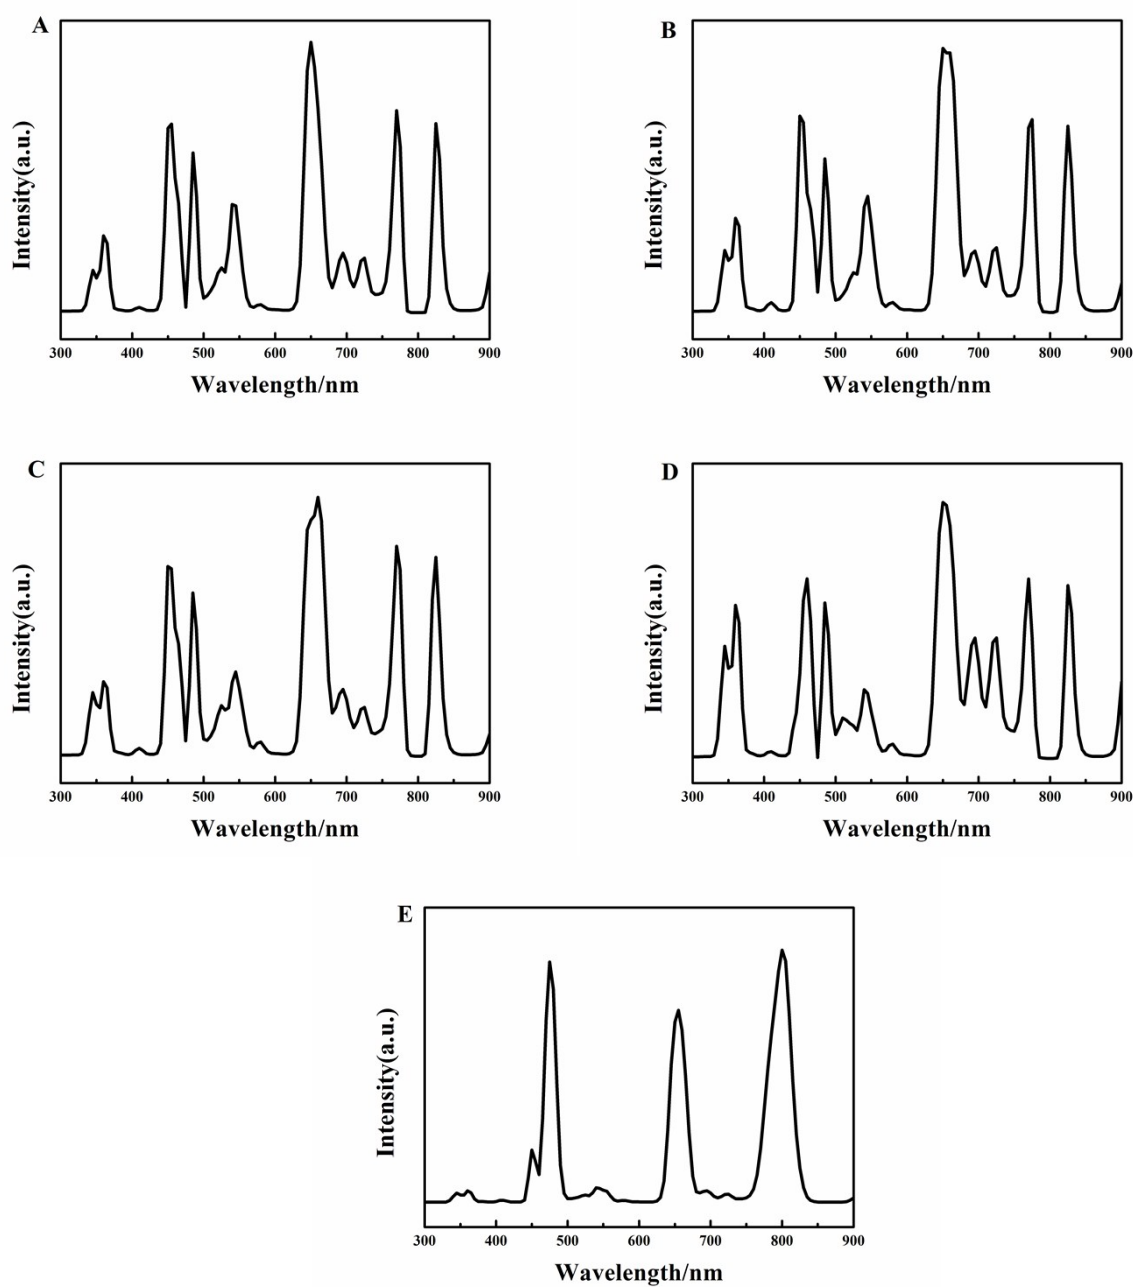**Figure S3.** Room temperature UC emission spectra of (A) the  $\beta$ -NaYF<sub>4</sub>: 20%Yb<sup>3+</sup>, 0.5%Tm<sup>3+</sup>. (B) the  $\beta$ -NaYF<sub>4</sub>: 30%Yb<sup>3+</sup>, 0.5%Tm<sup>3+</sup>. (C) the  $\beta$ -NaYF<sub>4</sub>: 50%Yb<sup>3+</sup>, 0.5%Tm<sup>3+</sup>. (D) the  $\beta$ -NaYF<sub>4</sub>: 70%Yb<sup>3+</sup>, 0.5%Tm<sup>3+</sup>. (E) the  $\beta$ -NaYF<sub>4</sub>: 99.5%Yb<sup>3+</sup>, 0.5%Tm<sup>3+</sup>. The samples were tested under laser excitation at 980nm with the pump power of 250mW.

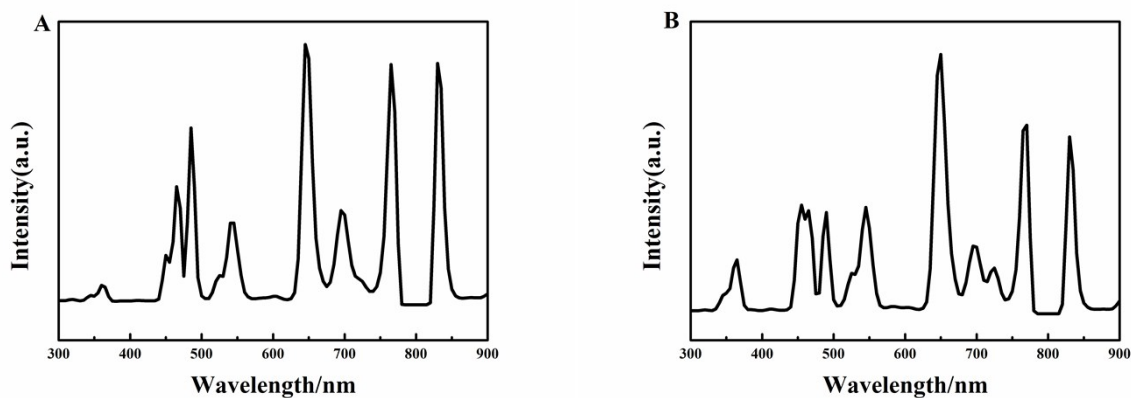

**Figure S4.** Room temperature UC emission spectra of (A) the  $\beta$ -NaYF<sub>4</sub>: 10%Yb<sup>3+</sup>, 1.0%Mn<sup>2+</sup>, 0.5%Tm<sup>3+</sup>. (B) the  $\beta$ -NaYF<sub>4</sub>: 10%Yb<sup>3+</sup>, 2.0%Mn<sup>2+</sup>, 0.5%Tm<sup>3+</sup>. The samples were tested under laser excitation at 980nm with the pump power of 250mW.

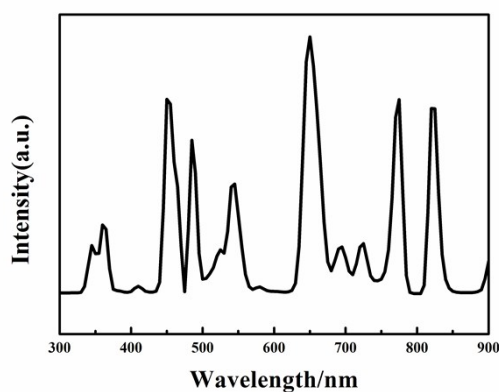

**Figure S5.** Room temperature UC emission spectra of the  $\beta$ -NaYF<sub>4</sub>: 10%Yb<sup>3+</sup>, 0.5%Tm<sup>3+</sup> with the reaction time of 6h. The samples were tested under laser excitation at 980nm with the pump power of 250mW.

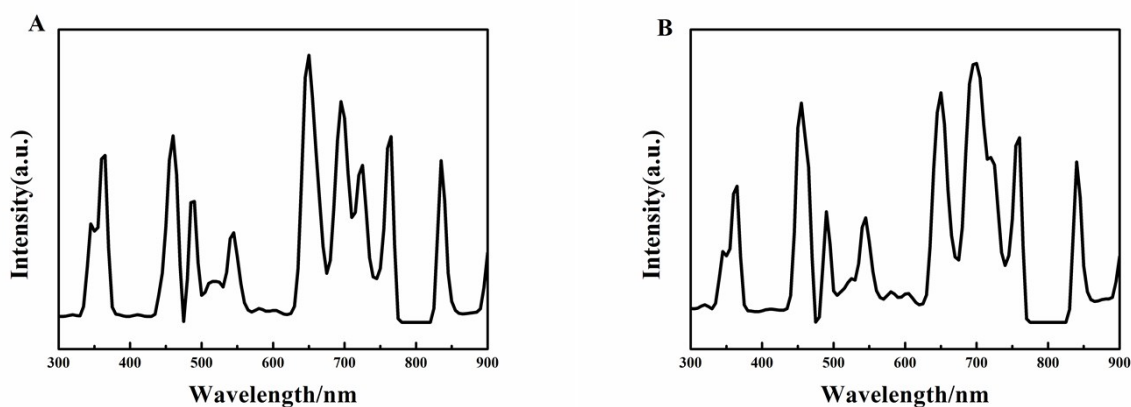

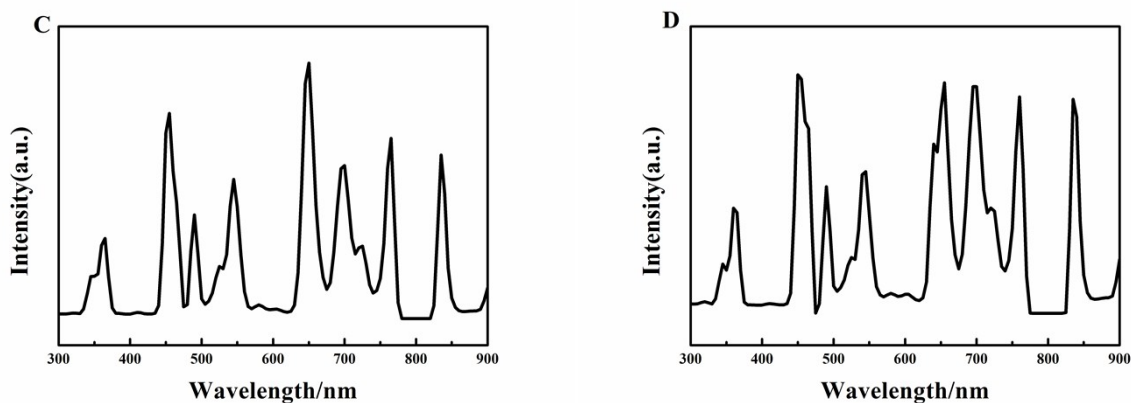

**Figure S6.** Room temperature UC emission spectra of (A) the  $\beta$ -NaYF<sub>4</sub>: 10%Yb<sup>3+</sup>, 1%Tm<sup>3+</sup>. (B) the  $\beta$ -NaYF<sub>4</sub>: 10%Yb<sup>3+</sup>, 2%Tm<sup>3+</sup>. (C) the  $\beta$ -NaYF<sub>4</sub>: 10%Yb<sup>3+</sup>, 4%Tm<sup>3+</sup>. (D) the  $\beta$ -NaYF<sub>4</sub>: 10%Yb<sup>3+</sup>, 8%Tm<sup>3+</sup>. The samples were tested under laser excitation at 980nm with the pump power of 250mW.

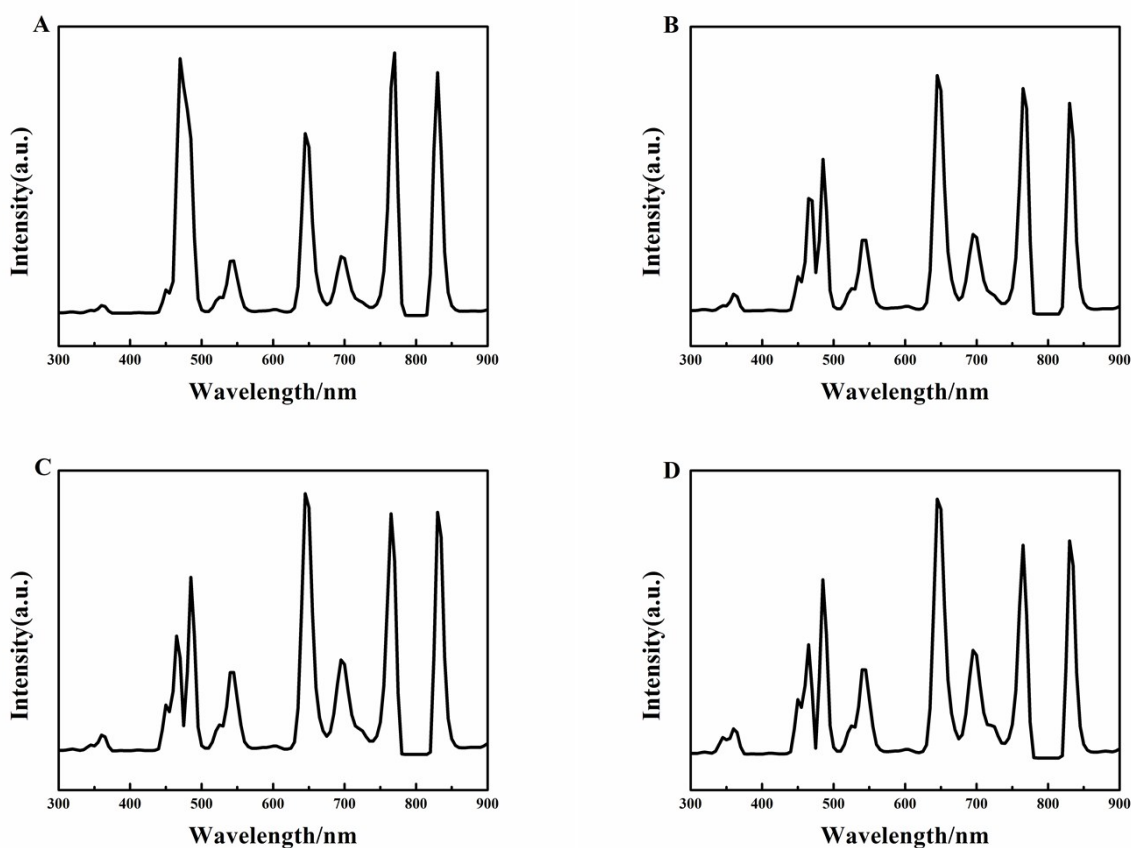

**Figure S7.** Room temperature UC emission spectra of the  $\beta$ -NaYF<sub>4</sub>: 10%Yb<sup>3+</sup>, 1.0%Mn, 1%Tm<sup>3+</sup> under laser excitation at 980nm with different pump power: (A) 150mW, (B) 200mW, (C) 250mW, (D) 300mW.

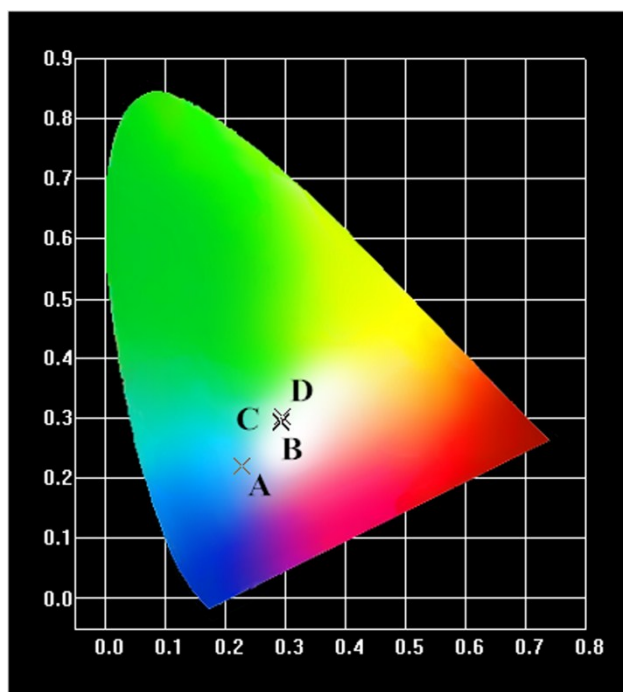

**Figure S8.** CIE chromaticity diagram of the  $\beta$ -NaYF<sub>4</sub>: 10%Yb, 1.0%Mn, 0.5%Tm samples prepared under laser excitation at 980nm with different Pump power: (A) 150mW, (B) 200mW, (C) 250mW, (D) 300mW.

**Table S1.** The emission intensities table of  $\beta$ -NaYF<sub>4</sub>: xYb, 0.5%Tm prepared with different concentration of Yb<sup>3+</sup> at different wavelengths, The integrated intensities of two photon transition(T) and The intensities of the overall integrated emission (four photon transition group + three photon transition group + two photon transition group)(A). The pump power is 250mW at 980nm.

| content | 350nm     | 450nm     | 475nm     | 550nm     | 650nm     | T         | A         |
|---------|-----------|-----------|-----------|-----------|-----------|-----------|-----------|
| 5%      | 1.21091E6 | 3.10826E6 | 4.03861E7 | 2.85854E7 | 4.66132E7 | 1.03327E8 | 2.18174E8 |
| 10%     | 1.28849E7 | 2.96692E7 | 1.40751E7 | 1.93289E7 | 5.46488E7 | 7.51999E7 | 2.05807E8 |
| 20%     | 1.35290E7 | 3.54517E7 | 1.73052E7 | 2.45435E7 | 6.64177E7 | 7.53523E7 | 2.32599E8 |
| 30%     | 1.91423E7 | 3.52734E7 | 1.67406E7 | 2.34426E7 | 7.81401E7 | 7.38938E7 | 2.46633E8 |
| 50%     | 1.41098E7 | 3.76859E7 | 1.91857E7 | 2.76701E7 | 8.19835E7 | 8.88300E7 | 2.69465E8 |
| 70%     | 3.77945E7 | 3.17367E7 | 1.82998E7 | 1.56425E7 | 7.65863E7 | 9.76660E7 | 2.77726E8 |
| 99.5%   | 1.81898E6 | 5.78565E6 | 4.58349E7 | 3.6801E6  | 5.14672E7 | 9.31085E7 | 2.01695E8 |

**Table S2.** The emission intensities table of  $\beta$ -NaYF<sub>4</sub>: 10%Yb, xMn, 0.5%Tm prepared with different concentration of Mn<sup>2+</sup> at different wavelengths, The integrated intensities of two photon transition(T) and The intensities of the overall integrated emission (four photon transition group + three photon transition group + two photon transition group)(A). The pump power is 250mW at 980nm.

| content | 350nm     | 450nm     | 475nm     | 550nm     | 650nm     | T         | A         |
|---------|-----------|-----------|-----------|-----------|-----------|-----------|-----------|
| 0.5%    | 1.40010E6 | 1.2133E7  | 1.53714E7 | 3.31835E7 | 3.33888E7 | 5.45448E7 | 1.62624E8 |
| 1.0%    | 2.03494E6 | 1.15387E7 | 1.61338E7 | 1.46687E7 | 3.99755E7 | 6.36254E7 | 1.47977E8 |
| 2.0%    | 7.03617E6 | 2.39349E7 | 1.08266E7 | 2.01444E7 | 4.80903E7 | 6.93742E7 | 1.79407E8 |
| 8.0%    | 1.05587E7 | 3.33183E7 | 1.16215E7 | 1.8233E7  | 4.55734E7 | 7.57524E7 | 1.95057E8 |

**Table S3.** The emission intensities table of  $\beta$ -NaYF<sub>4</sub>: 10%Yb, 0.5%Tm prepared with different reaction times at different wavelengths, The integrated intensities of two photon transition(T) and The intensities of the overall integrated emission (four photon transition group + three photon transition group + two photon transition group)(A). The pump power is 250mW at 980nm.

| time | 350nm     | 450nm     | 475nm     | 550nm     | 650nm     | T         | A         |
|------|-----------|-----------|-----------|-----------|-----------|-----------|-----------|
| 0.5h | 0         | 10854     | 713708    | 95125     | 192311    | 1.37776E6 | 2.38976E6 |
| 6.0h | 6.33139E6 | 7.91809E6 | 4.14534E6 | 4.92504E6 | 1.36817E7 | 2.09786E7 | 5.79801E7 |
| 12h  | 6.49636E6 | 7.81754E6 | 4.12552E6 | 5.09903E6 | 1.06504E7 | 2.19474E7 | 5.61363E7 |
| 24h  | 1.28849E7 | 2.96692E7 | 1.40751E7 | 1.93289E7 | 5.46488E7 | 7.51999E7 | 2.05807E8 |

**Table S4.** The emission intensities table of  $\beta$ -NaYF<sub>4</sub>: 10%Yb, xTm prepared with different concentration of Tm<sup>3+</sup> at different wavelengths, The integrated intensities of two photon transition(T) and The intensities of the overall integrated emission (four photon transition group + three photon transition group + two photon transition group)(A). The pump power is 250mW at 980nm.

| Content | 350nm     | 450nm     | 475nm     | 550nm     | 650nm     | T         | A         |
|---------|-----------|-----------|-----------|-----------|-----------|-----------|-----------|
| 0.5%    | 1.28849E7 | 2.96692E7 | 1.40751E7 | 1.93289E7 | 5.46488E7 | 7.51999E7 | 2.05807E8 |
| 1%      | 1.63974E7 | 3.98101E7 | 1.15991E7 | 1.9056E7  | 6.21167E7 | 1.12183E8 | 2.61162E8 |
| 2%      | 2.16587E7 | 4.02696E7 | 1.03391E7 | 2.00332E7 | 4.49127E7 | 1.44560E8 | 2.81773E8 |
| 4%      | 1.07098E7 | 3.7887E7  | 1.06998E7 | 2.478E7   | 4.38053E7 | 8.41078E7 | 2.11989E8 |
| 8%      | 1.2157E7  | 3.99085E7 | 1.0426E7  | 2.33243E7 | 4.61303E7 | 1.03228E8 | 2.35174E8 |

**Table S5.** The emission intensities table of  $\beta$ -NaYF<sub>4</sub>: 10%Yb, 1.0%Mn, 0.5%Tm prepared with different Pump power at different wavelengths, The integrated intensities of two photon transition(T) and The intensities of the overall integrated emission (four photon transition group + three photon transition group + two photon transition group)(A).

| Pump power | 350nm        | 450nm     | 475nm     | 550nm     | 650nm     | T         | A         |
|------------|--------------|-----------|-----------|-----------|-----------|-----------|-----------|
| 150mW      | 596902.79885 | 1.55618E6 | 3.81773E7 | 6.67475E6 | 1.98513E7 | 5.50617E7 | 1.21918E8 |
| 200mW      | 1.16481E6    | 1.08227E7 | 1.27096E7 | 1.06087E7 | 3.19507E7 | 6.05922E7 | 1.27849E8 |
| 250mW      | 1.42033E6    | 1.1243E7  | 1.30177E7 | 1.06972E7 | 3.12463E7 | 6.02035E7 | 1.29660E8 |
| 300mW      | 2.74021E6    | 1.17677E7 | 1.47312E7 | 1.27151E7 | 3.61397E7 | 6.38436E7 | 1.41938E8 |
